# Supplementary material
Source: publisher site journal article supplement (https://www.dovepress.com/article/378524)

**Supplementary Figure 1** Heatmap distribution of virulent factor genes in smart watches and mobile phones


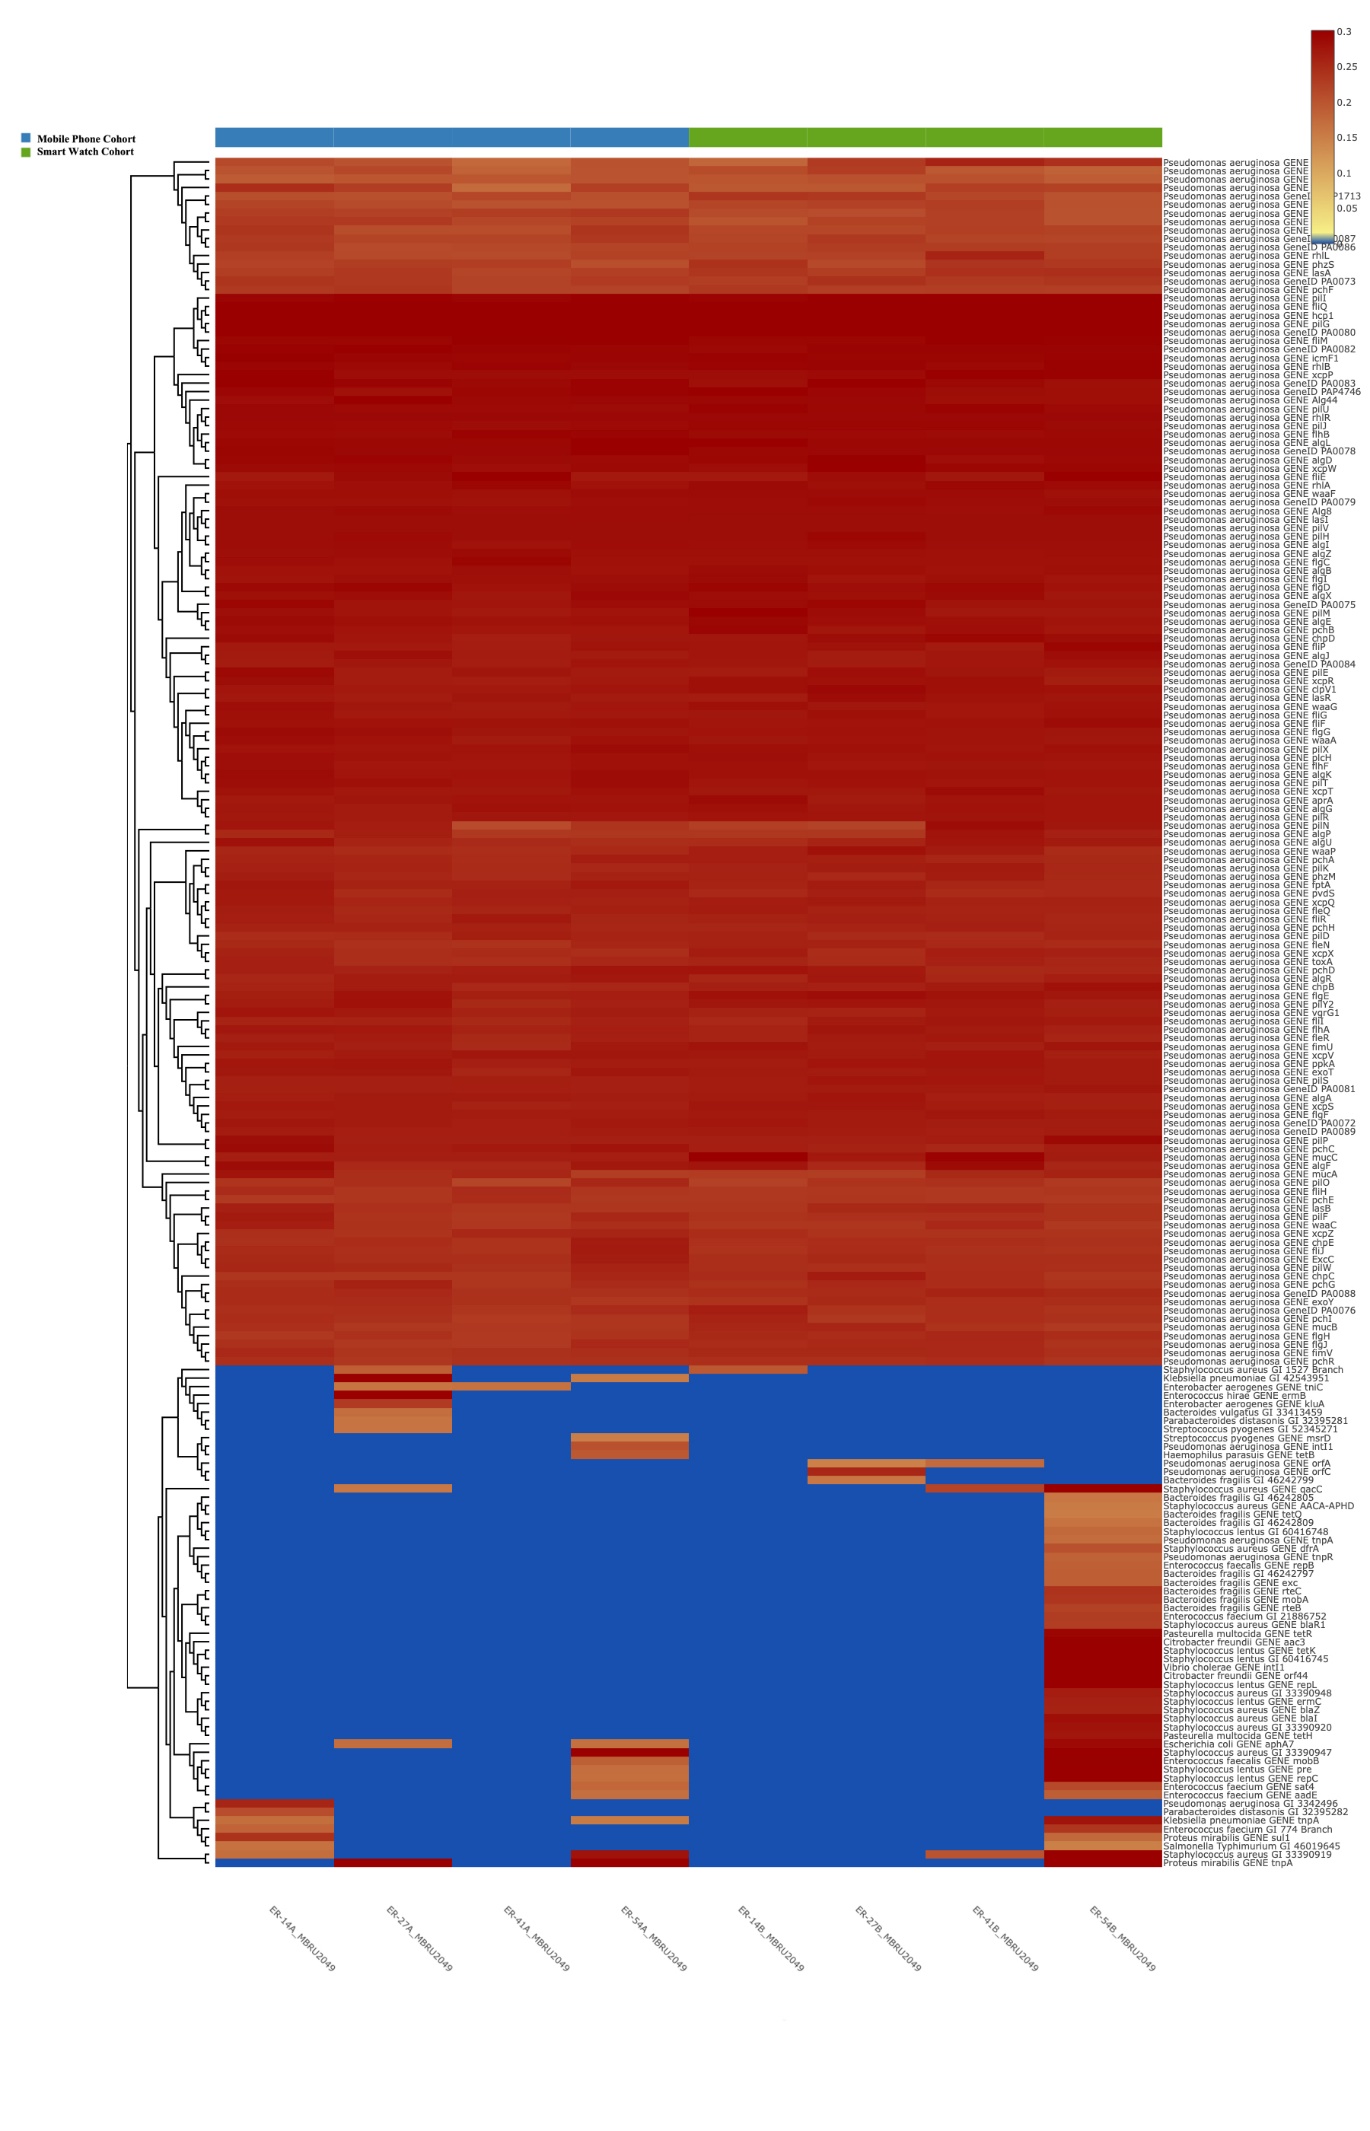


**Supplementary Figure 2** Heatmap map distribution of antibiotic resistant genes in smart watches and mobile phones


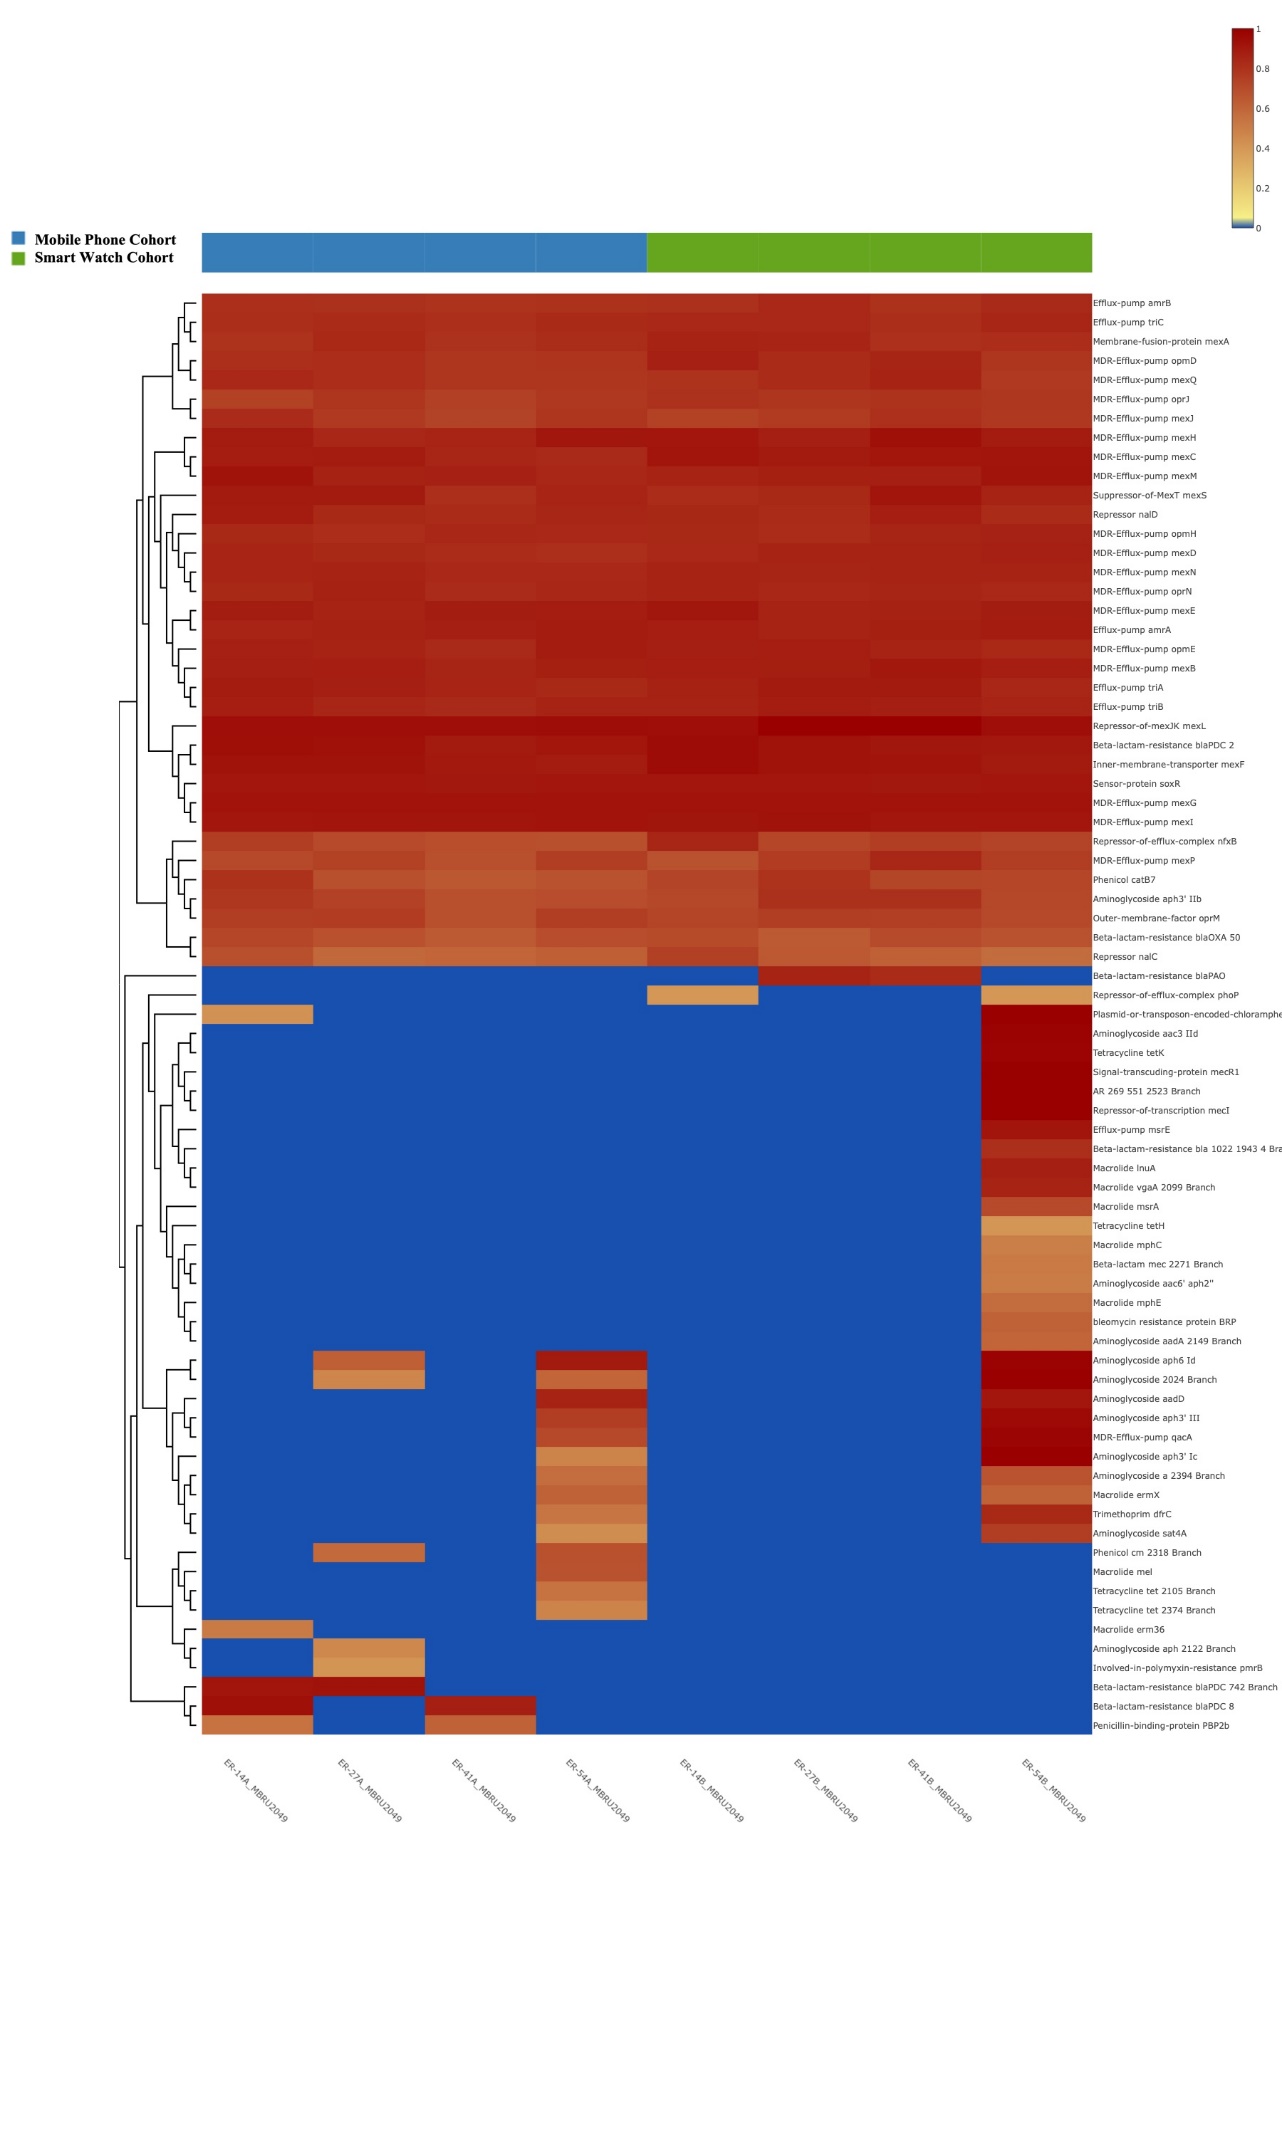

Supplement: Supplementary file 1 [file get_supplementary_file.php]
